# Supplementary material for: Lithium nitrate salt-assisted CO2 absorption for the formation of corrosion barrier layer on AZ91D magnesium alloy
Source: Royal Society of Chemistry journal article supplement (doi:10.1039/d4ra02829e), 2024-01-01
Supplement: d4ra02829e1.pdf [file d4ra02829e1.pdf]

## Supporting information

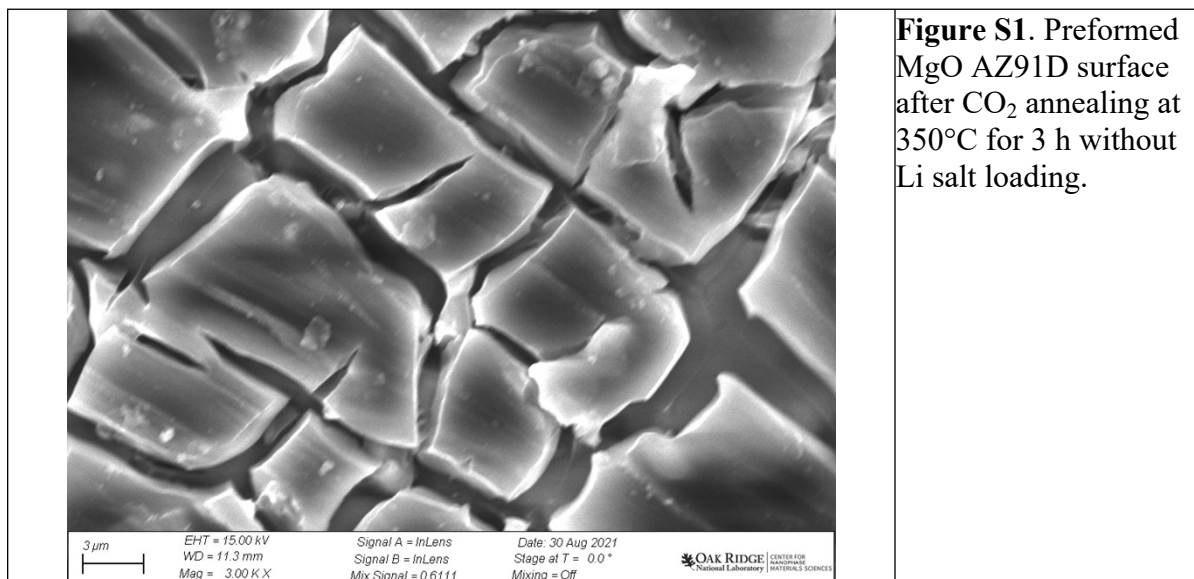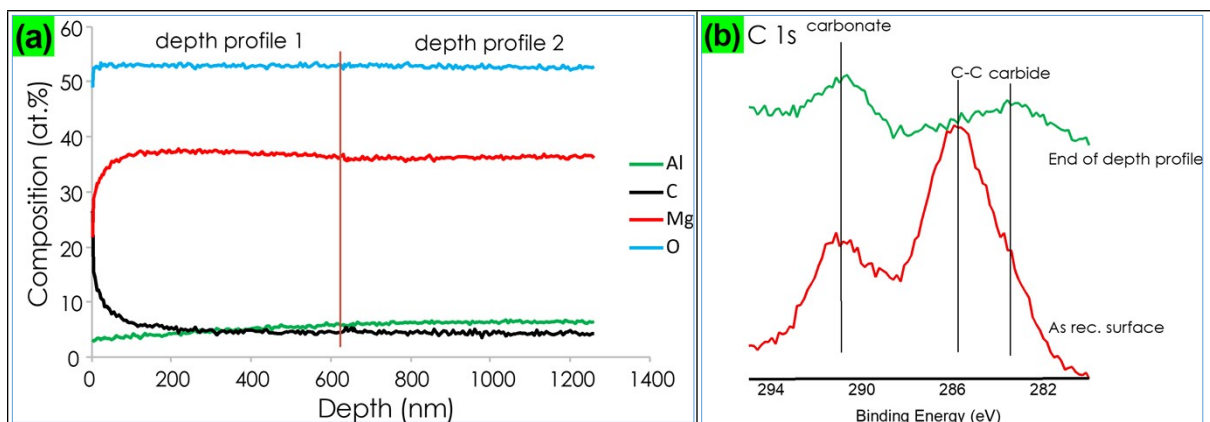

**Figure S2.** (a) XPS depth profiling of CO<sub>2</sub> annealed sample (Li-0.5-1.0) and (b) XPS pattern of C 1s for before and after depth profile.

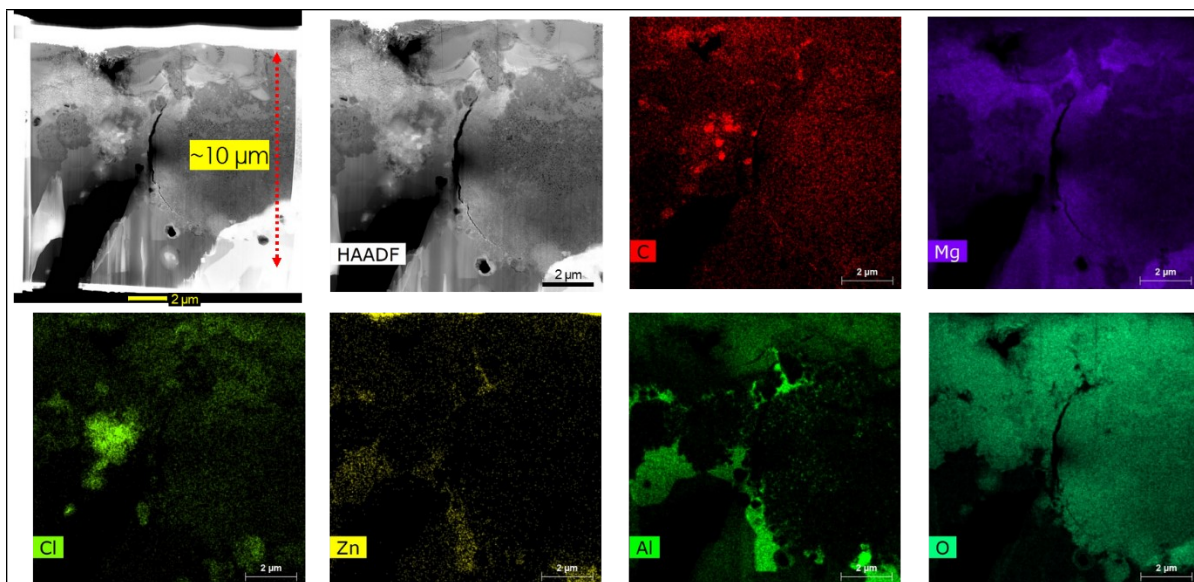

**Figure S3.** High-magnification cross-sectional (high angle ADF-STEM) images of the CO<sub>2</sub>-annealed AZ91D sample (Li-2.5-2.5) along with corresponding energy-dispersive X-ray spectroscopy elemental mapping showing the distribution of Mg, O, Al, C, Cl and Zn in the formed layer (10 μm)

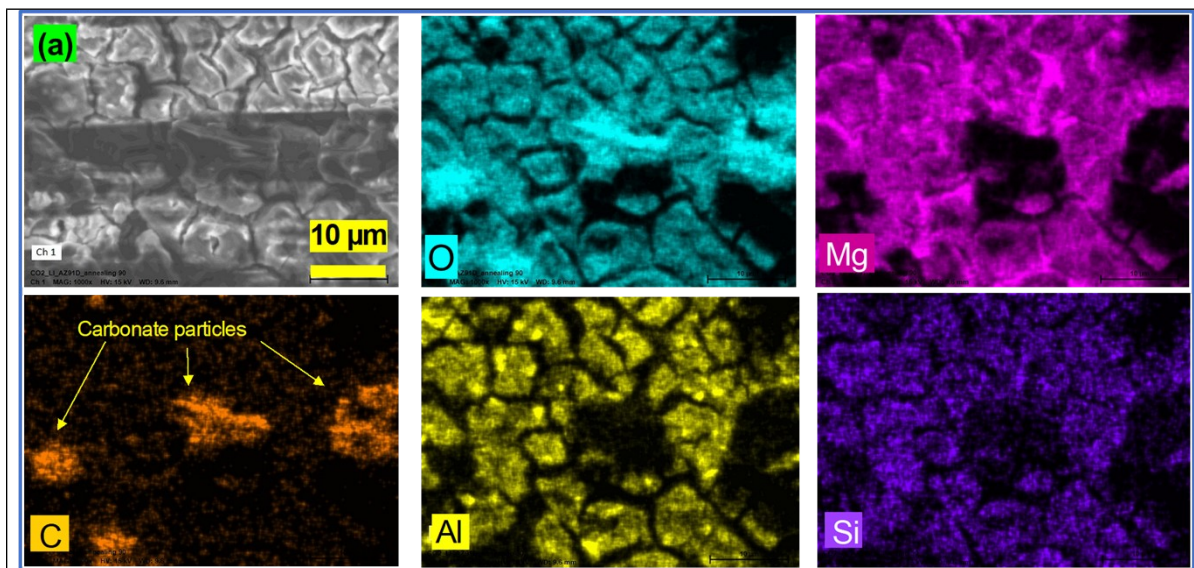

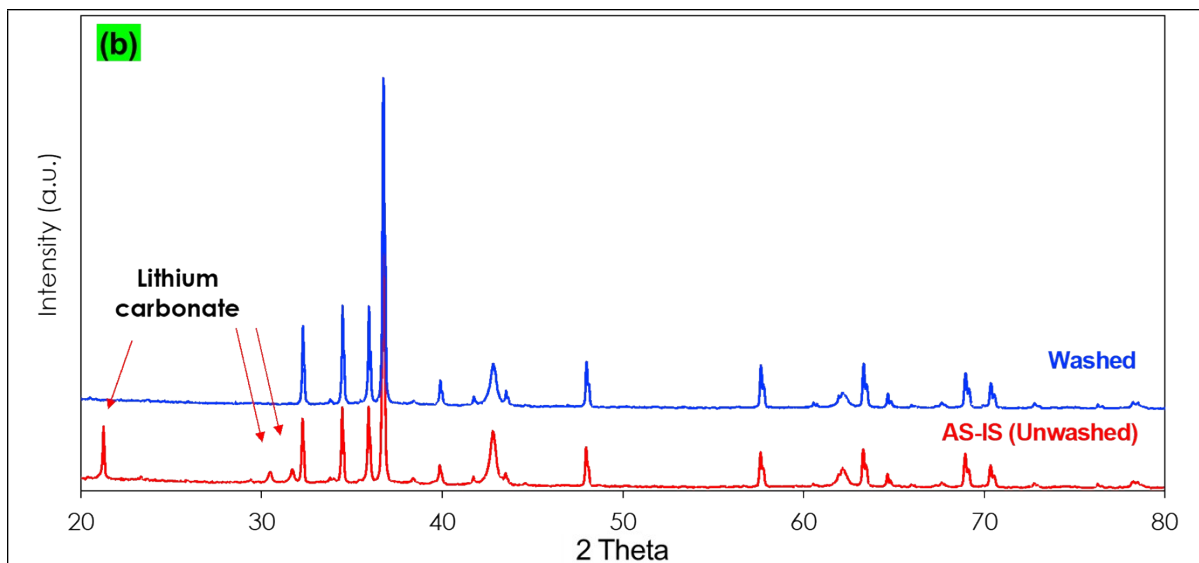

**Figure S4.** (a) SEM-EDS of CO<sub>2</sub>-annealed AZ91D (i.e., Li-2.5-2.5) without washing (b) corresponding XRD measurements of as prepared vs. washed samples.

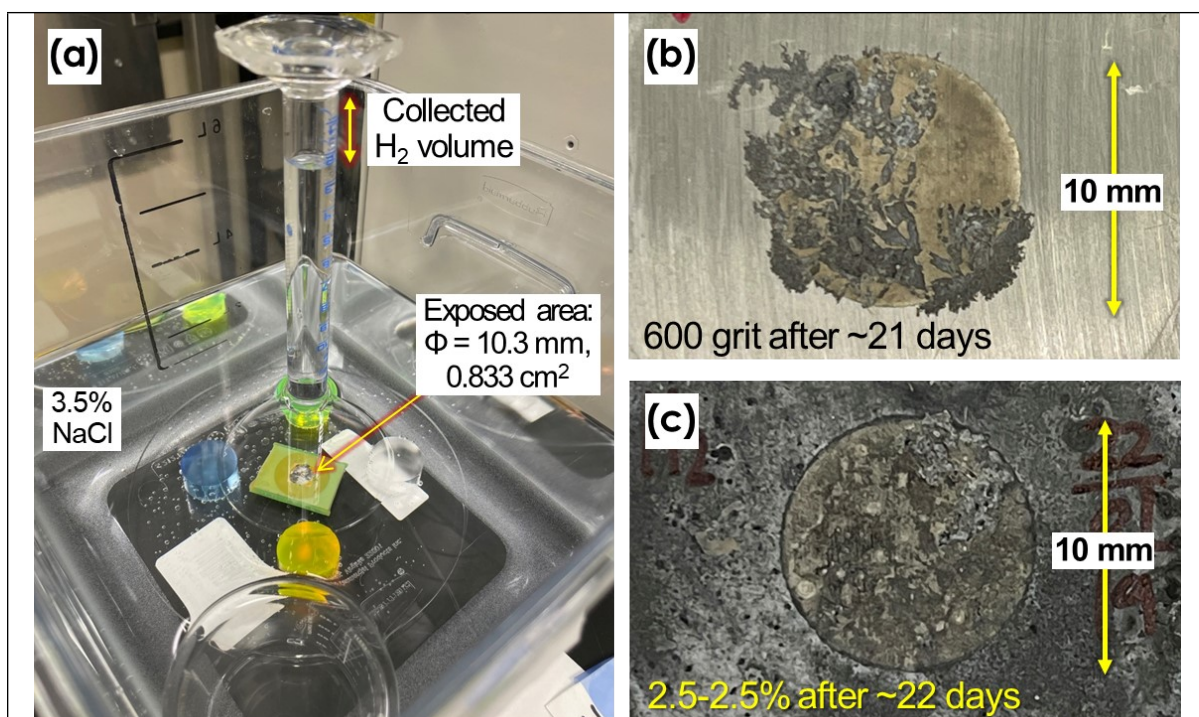

**Figure S5.** Corrosion mitigation effects of CO<sub>2</sub>-treated layer on the Mg specimen: photo-images of the untreated 600 grit-finished AZ91D (a) and CO<sub>2</sub>-treated AZ91D (b) specimens (exposed surface area: 0.833 cm<sup>2</sup>) after 21 and 22 day immersion in 3.5 wt.% NaCl solution. (c) Hydrogen collection test of the CO<sub>2</sub>-treated samples compared with an untreated sample.

**Table S1.** Summary of impedance data fitting for untreated AZ91D with short- and long-term immersion.

| Sample ID | Short-term immersion (4 individual samples) |    |    |    | Untreated AZ91D long-term measurement (1 sample with 3 measurements) |
|-----------|---------------------------------------------|----|----|----|----------------------------------------------------------------------|
|           | u1                                          | u2 | u3 | u4 |                                                                      |
|           |                                             |    |    |    |                                                                      |

|                                         |                                  |         |         |         |        |         |        |
|-----------------------------------------|----------------------------------|---------|---------|---------|--------|---------|--------|
| Immersion time                          | 1 h                              | 1 h     | 1 h     | 1 h     | 1 h    | 6 h     | 23 h   |
| Corrosion potential / mV <sub>SCE</sub> | -1552                            | -1550   | -1548   | -1555   | -1570  | -1572   | -1564  |
| $R_1$ / ohm                             | 10                               | 7.8     | 13.4    | 6.2     | 14     | 14      | 16     |
| $R_2$ / ohm·cm <sup>2</sup>             | 2665                             | 1576    | 2697    | 3400    | 2644   | 1991    | 1434   |
| $CPE_0$                                 | Capacitance / F·cm <sup>-2</sup> | 1.06E-5 | 8.81E-6 | 1.07E-5 | 6.7E-6 | 1.07E-5 | 1.3E-5 |
|                                         | $n$                              | 0.94    | 0.95    | 0.93    | 0.94   | 0.93    | 0.91   |
| <i>Chi-squared</i>                      | 1.6E-3                           | 1.9E-3  | 1.6E-3  | 1.2E-3  | 8.7E-4 | 1.2E-3  | 1.3E-3 |

**Table S2.** Summary of impedance data fitting for Li2.5-2.5 with Ar treated AZ91D with long-term immersion to 21 h.

| Sample ID                               | Li 2.5-2.5 w/ Ar AZ91D long-term measurement (1 sample with 3 measurements) |         |         |
|-----------------------------------------|-----------------------------------------------------------------------------|---------|---------|
| Immersion time                          | 1 h                                                                         | 3 h     | 21 h    |
| Corrosion potential / mV <sub>SCE</sub> | -1617                                                                       | -1589   | -1574   |
| $R_1$ / ohm                             | 8.6                                                                         | 9.2     | 16.8    |
| $R_2$ / ohm·cm <sup>2</sup>             | 8656                                                                        | 10719   | 9204    |
| $CPE_0$                                 | Capacitance / F·cm <sup>-2</sup>                                            | 1.31E-4 | 1.15E-4 |
|                                         | $n$                                                                         | 0.91    | 0.94    |
| <i>Chi-squared</i>                      | 1.3E-3                                                                      | 1.6E-3  | 1.9E-3  |

**Table S3.** Summary of impedance data fitting for Li2.5-2.5 treated AZ91D with short- and long-term immersion.

| Sample ID                         | Short-term immersion (2 individual samples) |              | Li 2.5-2.5 AZ91D long-term measurement (1 sample with 4 measurements) |         |         |         |
|-----------------------------------|---------------------------------------------|--------------|-----------------------------------------------------------------------|---------|---------|---------|
|                                   | t1                                          | t2           | 1 h                                                                   | 3 h     | 21 h    | 26 h    |
| Immersion time                    | 1 h                                         | 1 h          | 1 h                                                                   | 3 h     | 21 h    | 26 h    |
| OCP / mV <sub>SCE</sub>           | -1497                                       | -1559        | -1530                                                                 | -1515   | -1498   | -1514   |
| $R_1$ / ohm                       | 67                                          | 24           | 40                                                                    | 41      | 65      | 66      |
| $R_2$ & $R_f$ / ohm               | 37552 & -                                   | 41142 & 3069 | 58384 & 1250                                                          | 48757   | 54754   | 27649   |
| $R_2$ / ohm·cm <sup>2</sup>       | 31281                                       | -            | -                                                                     | 40615   | 45610   | 23032   |
| $R_f + R_2$ / ohm·cm <sup>2</sup> | -                                           | 36828        | 49675                                                                 | -       | -       | -       |
| $CPE_0$                           | Capacitance / F·cm <sup>-2</sup>            | 6E-5         | 5.37E-6                                                               | 3.78E-5 | 5.87E-5 | 6.57E-5 |
|                                   | $n$                                         | 0.92         | 0.88                                                                  | 0.79    | 0.83    | 0.91    |
| $CPE_f$                           | Capacitance / F·cm <sup>-2</sup>            | -            | 2.99E-5                                                               | 1.36E-5 | -       | -       |
|                                   | $n$                                         | -            | 0.8                                                                   | 0.9     | -       | -       |
| <i>Chi-squared</i>                | 5.2E-4                                      | 4.6E-4       | 4.3E-4                                                                | 1.9E-3  | 1.8E-3  | 1.8E-3  |
